# Supplementary material for: Variation in the Mercury Concentrations and Greenhouse Gas Emissions of Pristine and Managed Hemiboreal Peatlands
Source: MDPI journal article supplement (doi:10.3390/land11091414), 2022-08-28
Supplement: s1 [file s1]

**Supplementary material** to the article " Variation in the mercury concentrations and greenhouse gas emissions of pristine and managed hemiboreal peatlands".

Arta Bārdule<sup>1,\*</sup>, Linda Gerra-Inohosa<sup>1</sup>, Ivars Kļaviņš<sup>1,2</sup>, Zane Kļaviņa<sup>1,2</sup>, Krišs Bitenieks<sup>1</sup>, Aldis Butlers<sup>1</sup>, Andis Lazdiņš<sup>1</sup>, Zane Lībiete<sup>1</sup>

<sup>1</sup> Latvian State Forest Research Institute 'Silava' (LSFRI Silava), Rigas str. 111, Salaspils, Latvia, LV-2169

<sup>2</sup> University of Latvia, Jelgavas Str.1, Rīga, Latvia, LV-1004

\* Correspondence: arta.bardule@silava.lv

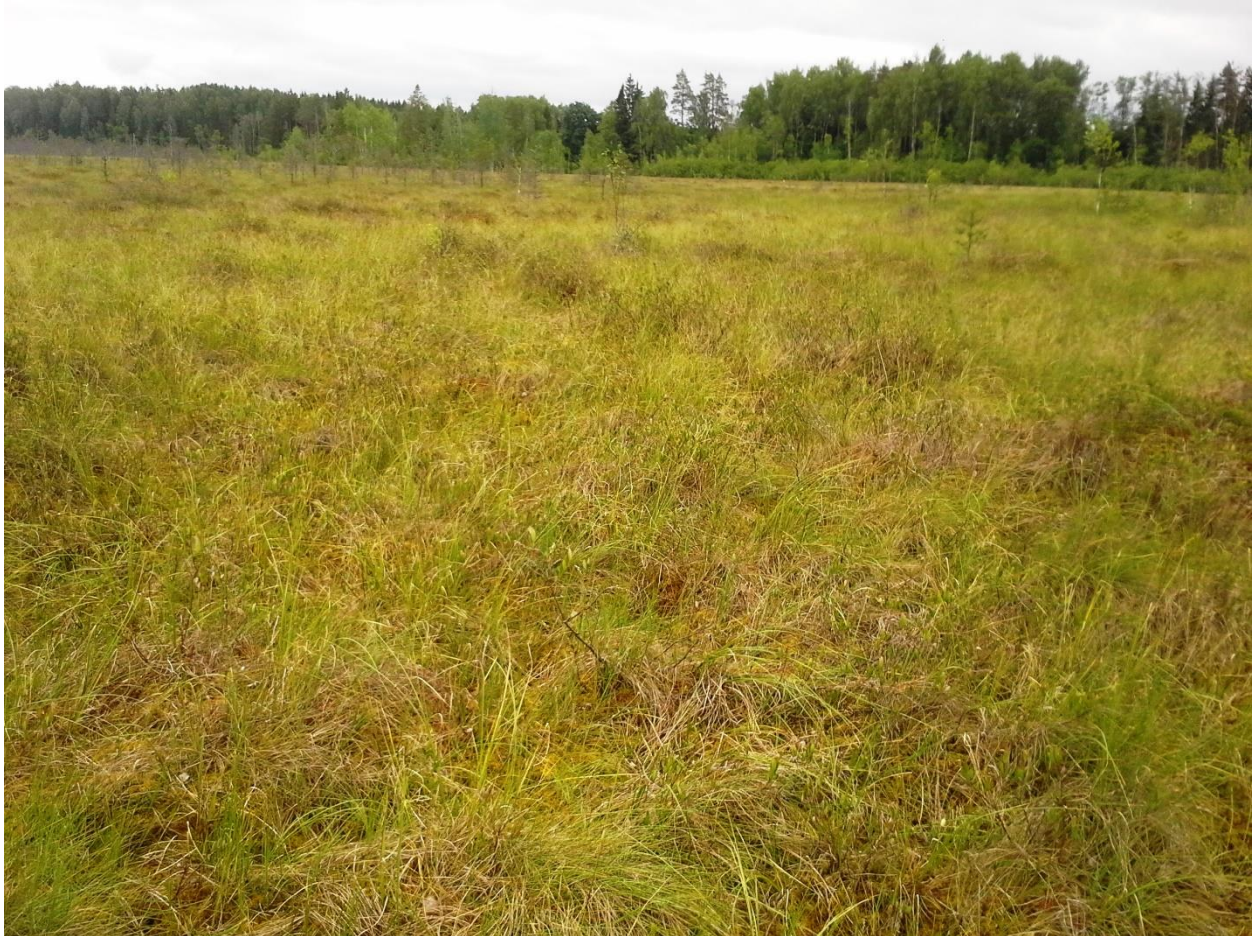

**Figure S1.** Transitional mire (Kazu Mire)

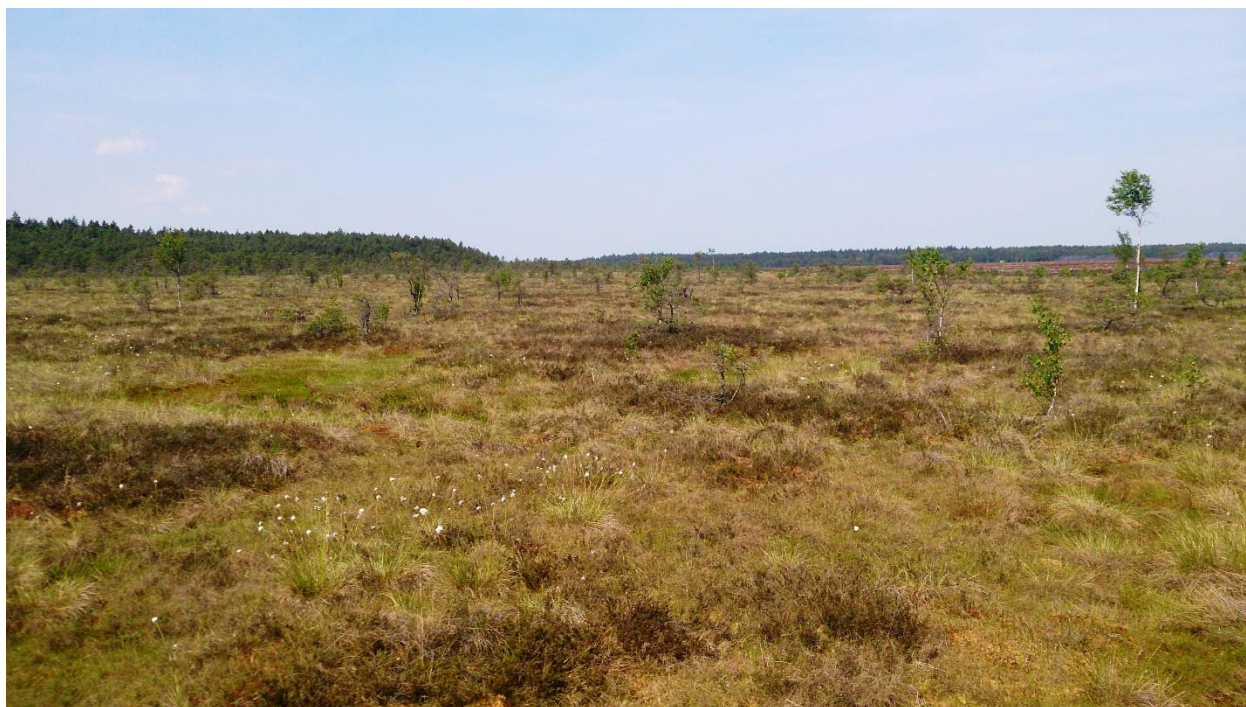

**Figure S2.** Raised bog (Lielsala Mire)

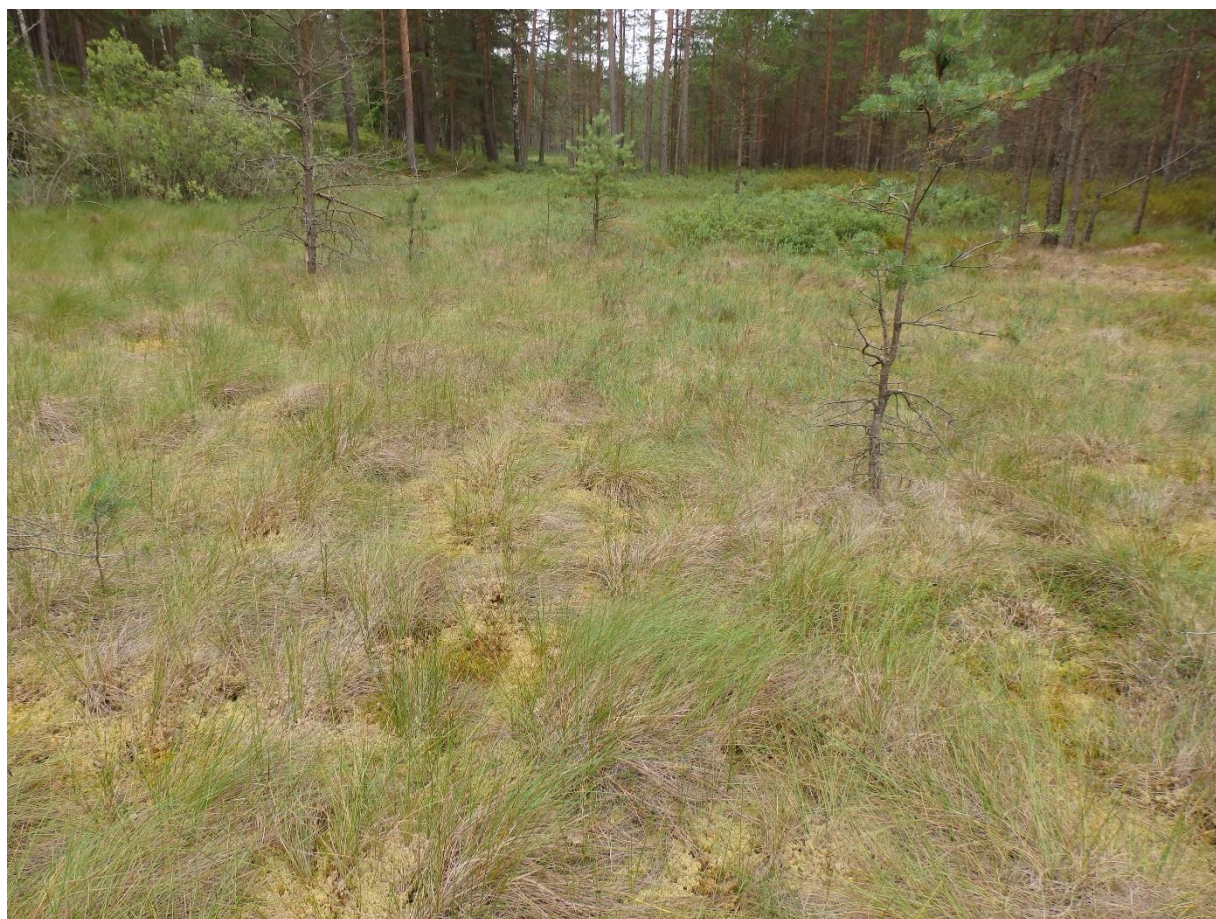

**Figure S3.** Raised bog (Kemerli Mire)

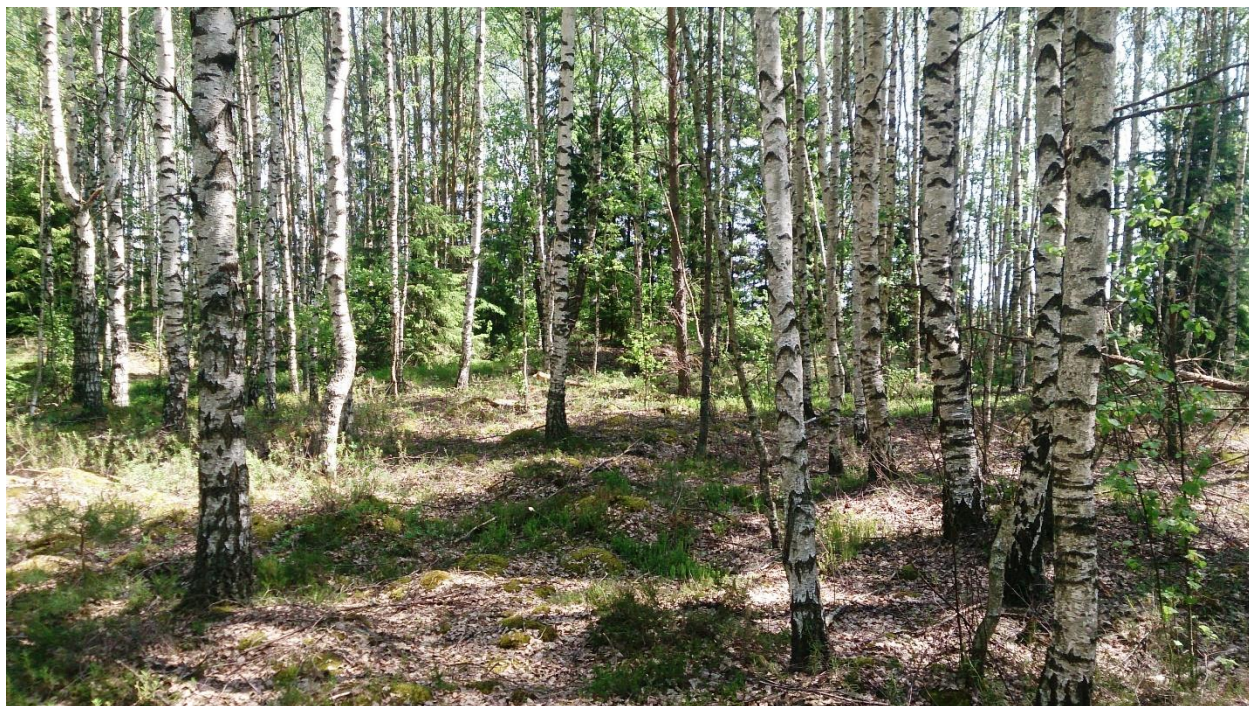

**Figure S4.** Broadleaved (Silver birch) forest on peat-land, > 20 years old (Lielsala Mire)

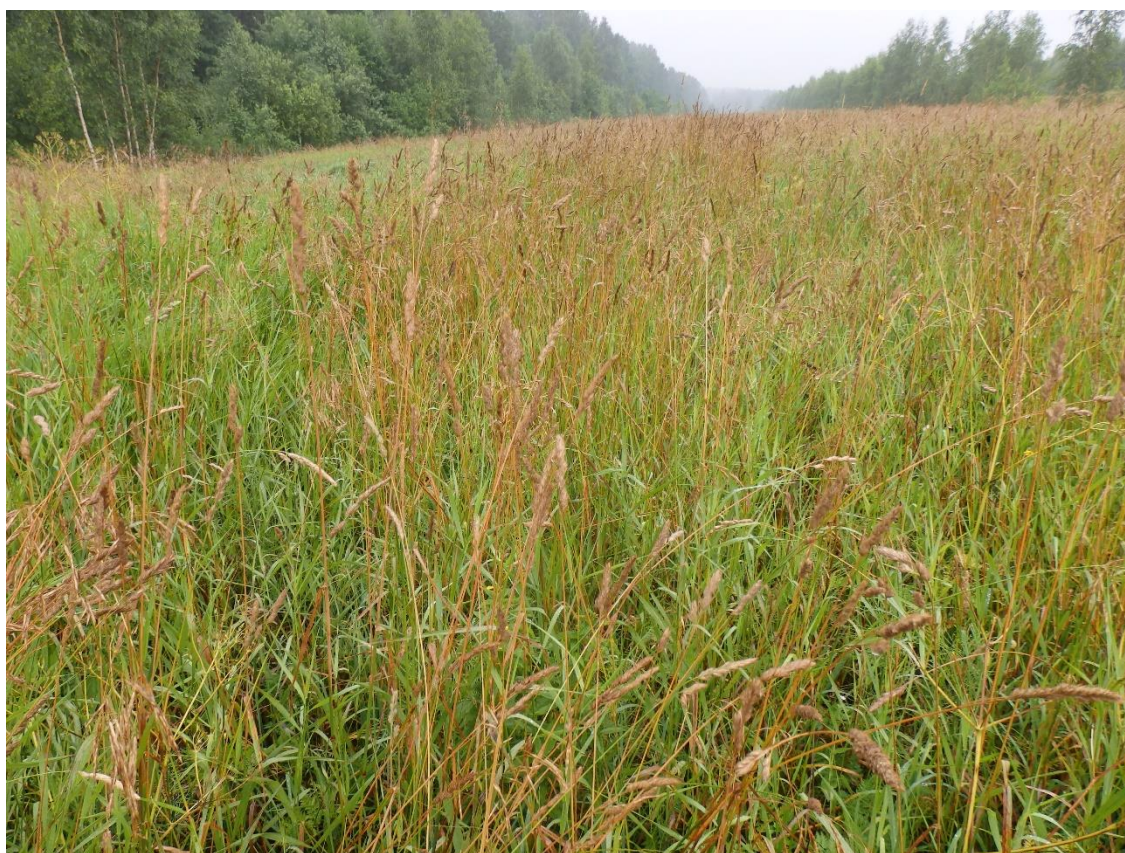

**Figure S5.** Perennial grassland on peatland (Kašķu Mire)

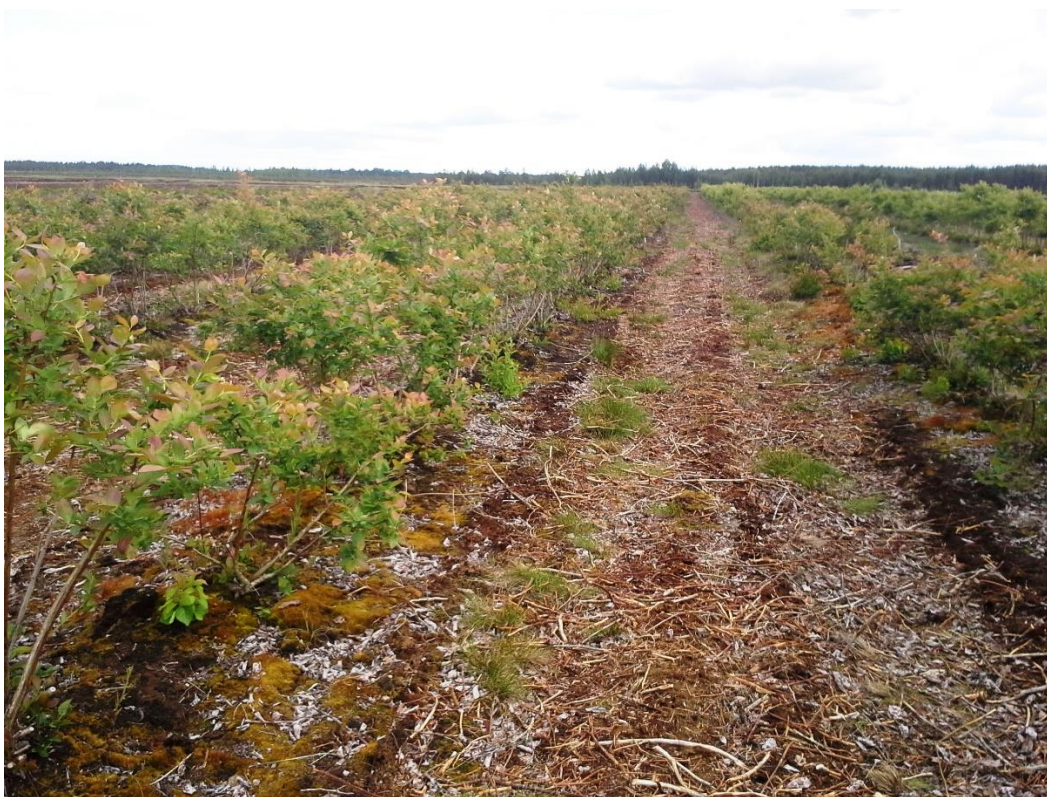

**Figure S6.** Commercial blueberry plantation on peatland (Kalna Mire)

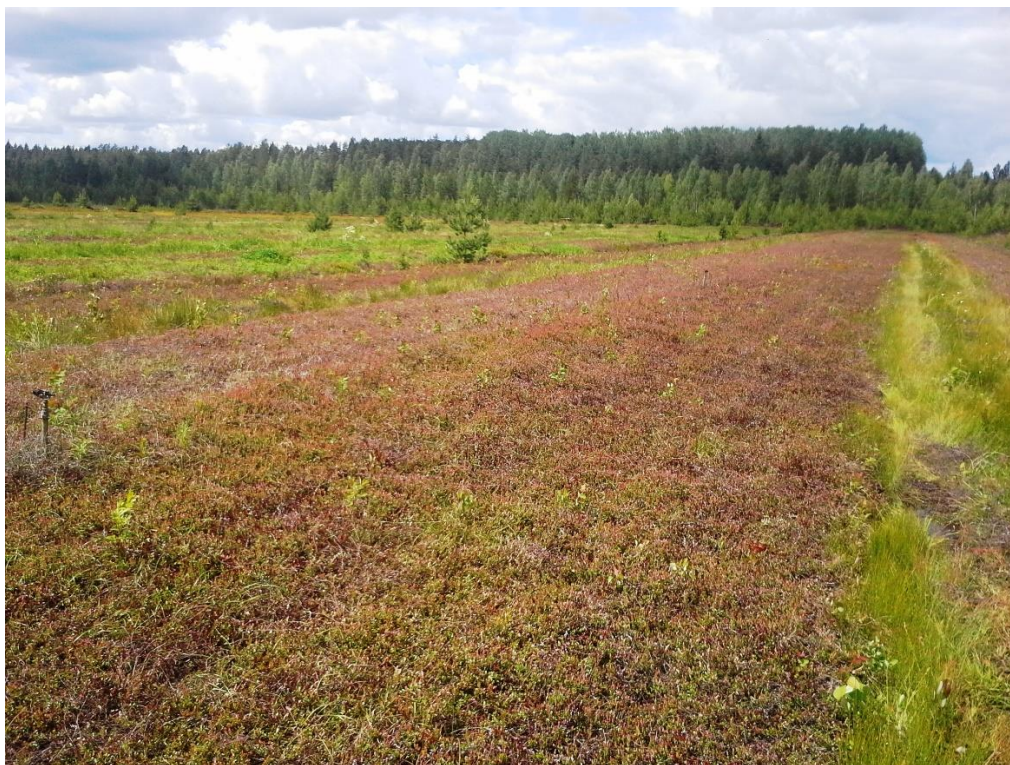

**Figure S7.** Commercial cranberry plantation on peatland (Kalna Mire)

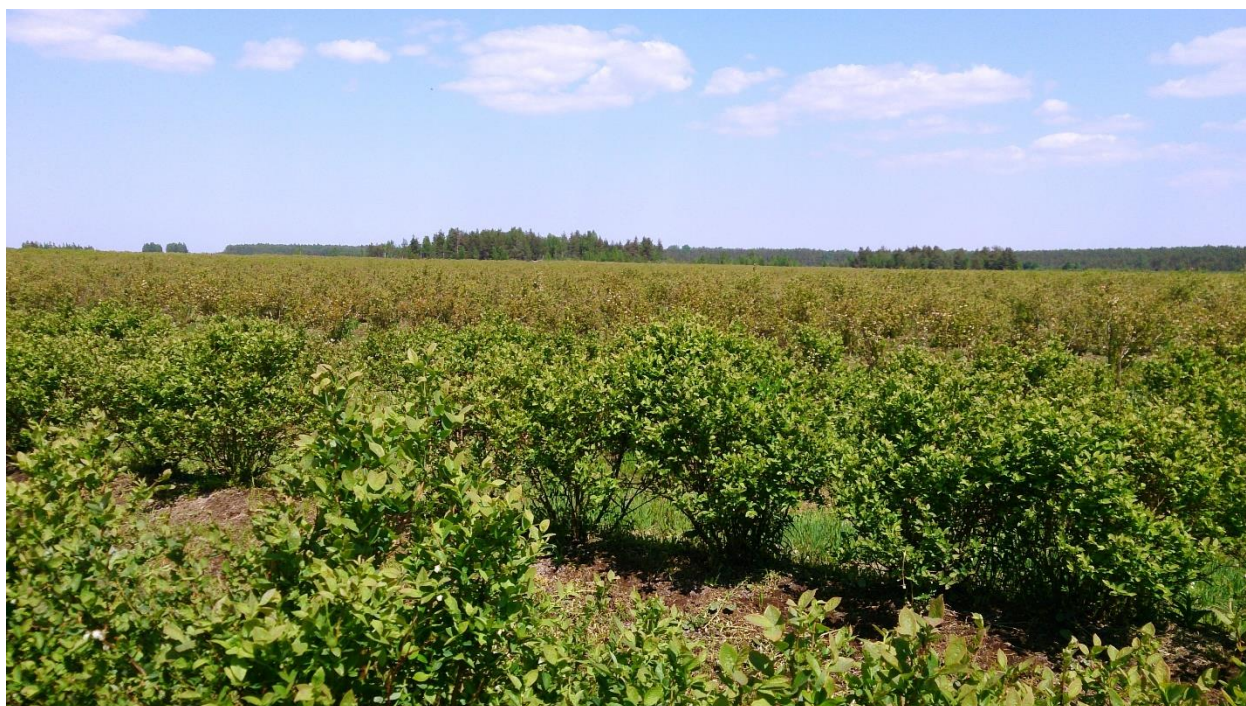

**Figure S8.** Commercial blueberry plantation on peatland (Kaigu Mire)

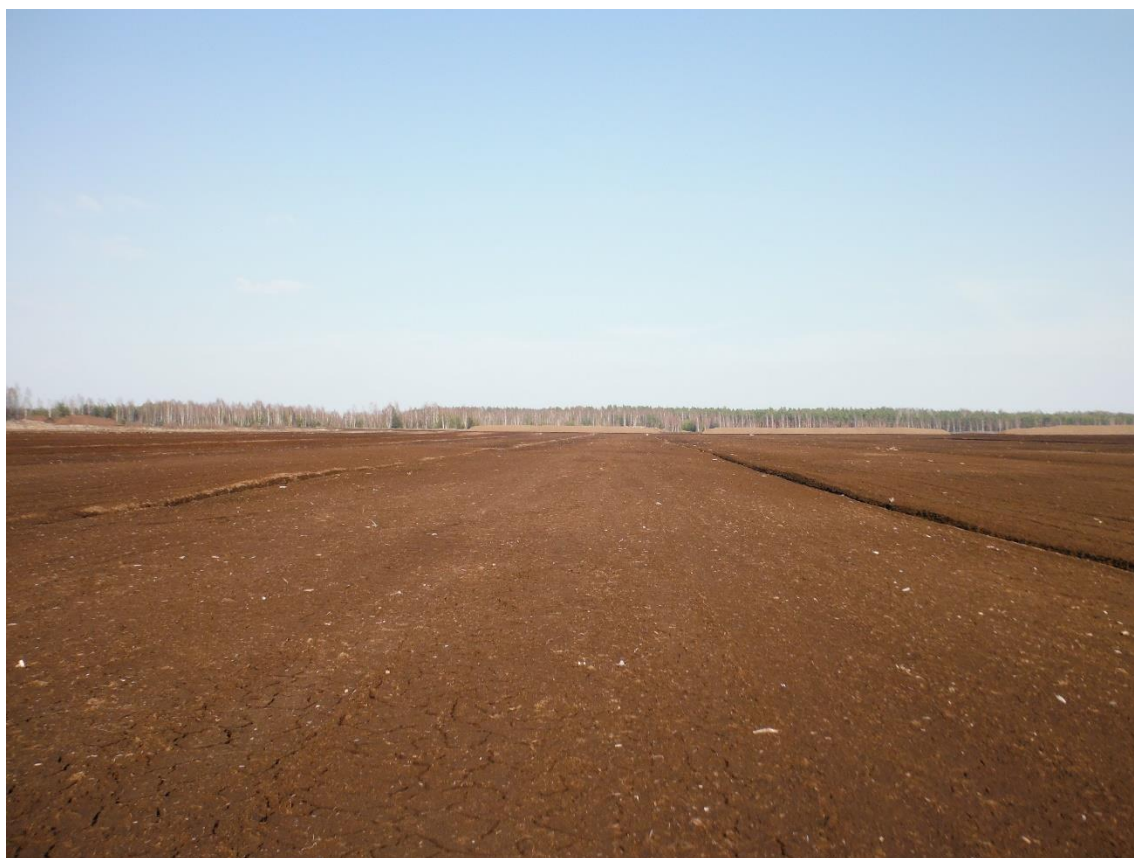

**Figure S9.** Abandoned peat extraction site not covered with vegetation (bare peat) (Cena Mire)

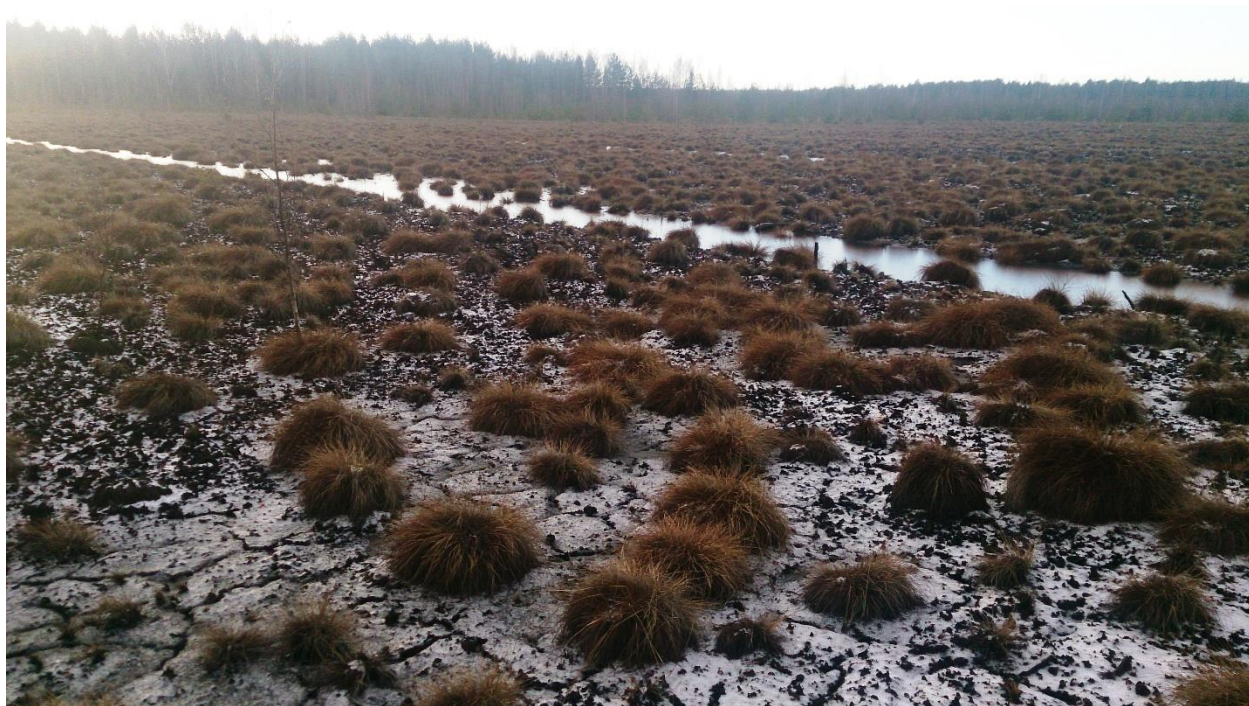

**Figure S10.** Abandoned peat extraction site with ground vegetation (Cena Mire)

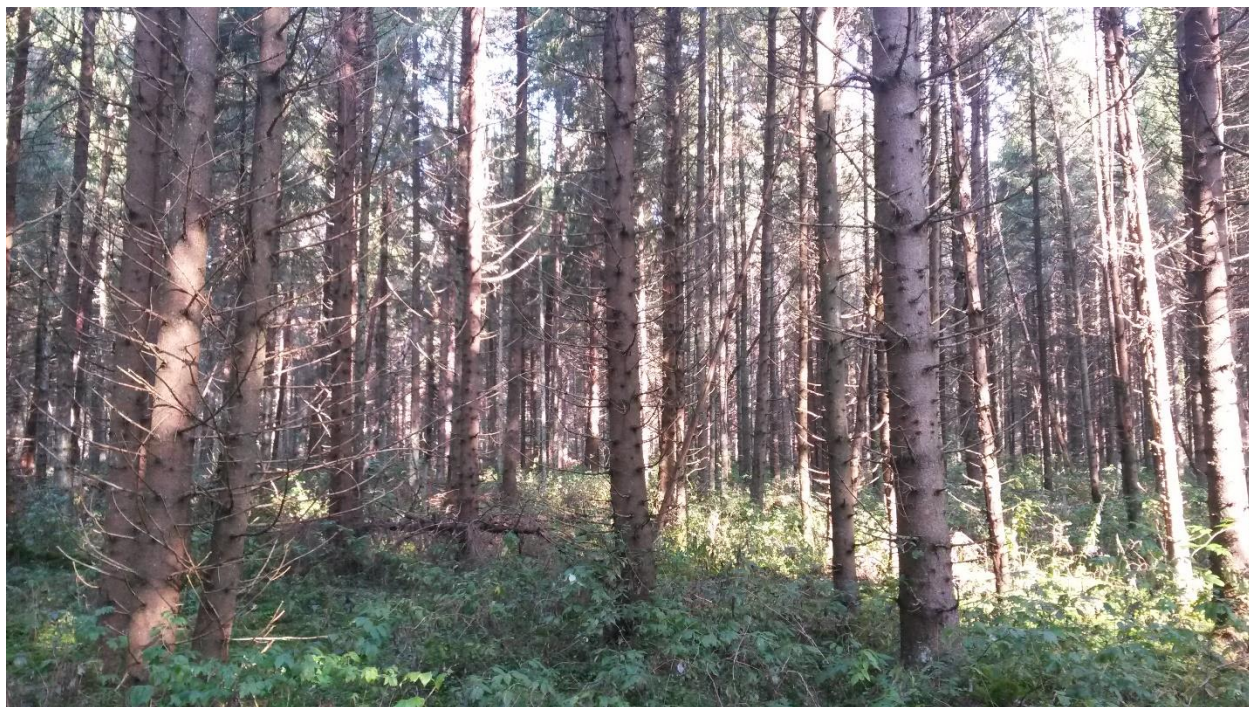

**Figure S11.** Middle-aged Norway spruce forest (Nelaubitis 1)
